# Supplementary material
Source: publisher figshare collection journal article supplement (https://karger.figshare.com/ndownloader/files/27788583)

Supplementary Figure 3a: Forest plot showing overall mortality based on severity of disease


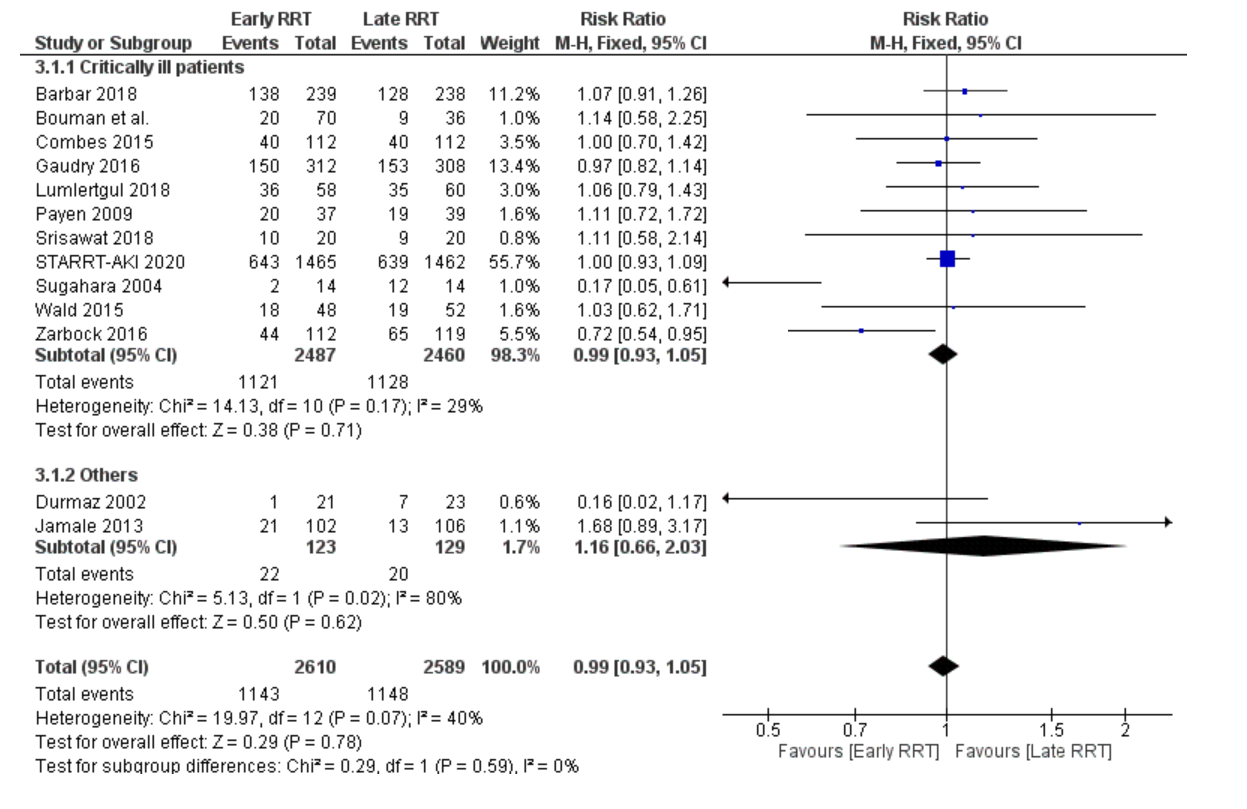


Supplementary Figure 3b: Forest plot showing 30-day mortality based on severity of disease


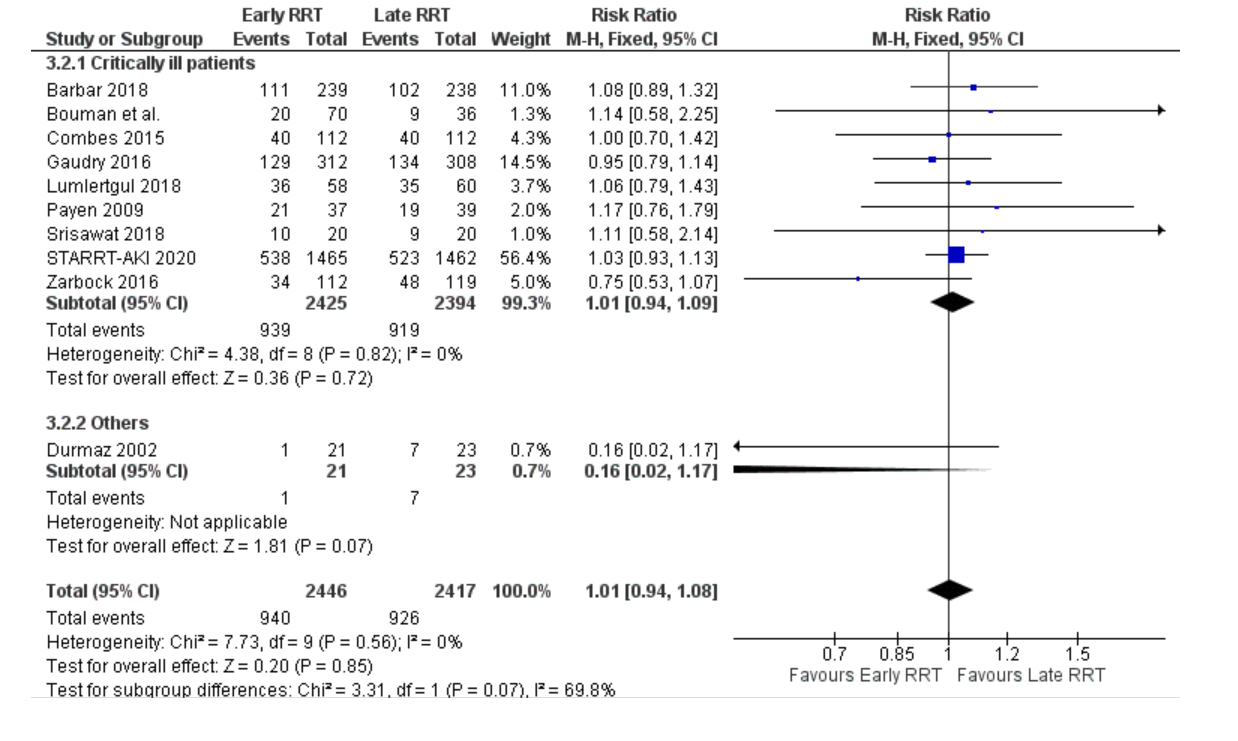


Figure 3c: Forest plot showing 90-day mortality based on severity of disease


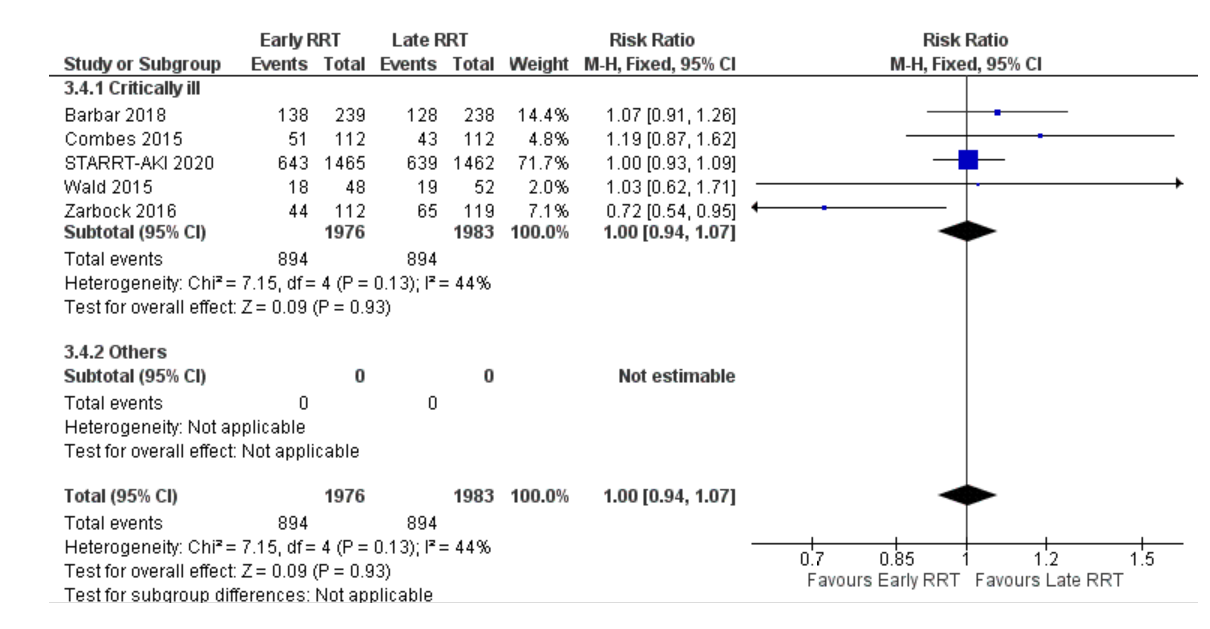


Figure 3 d: Forest plot showing overall mortality based on severity of disease.


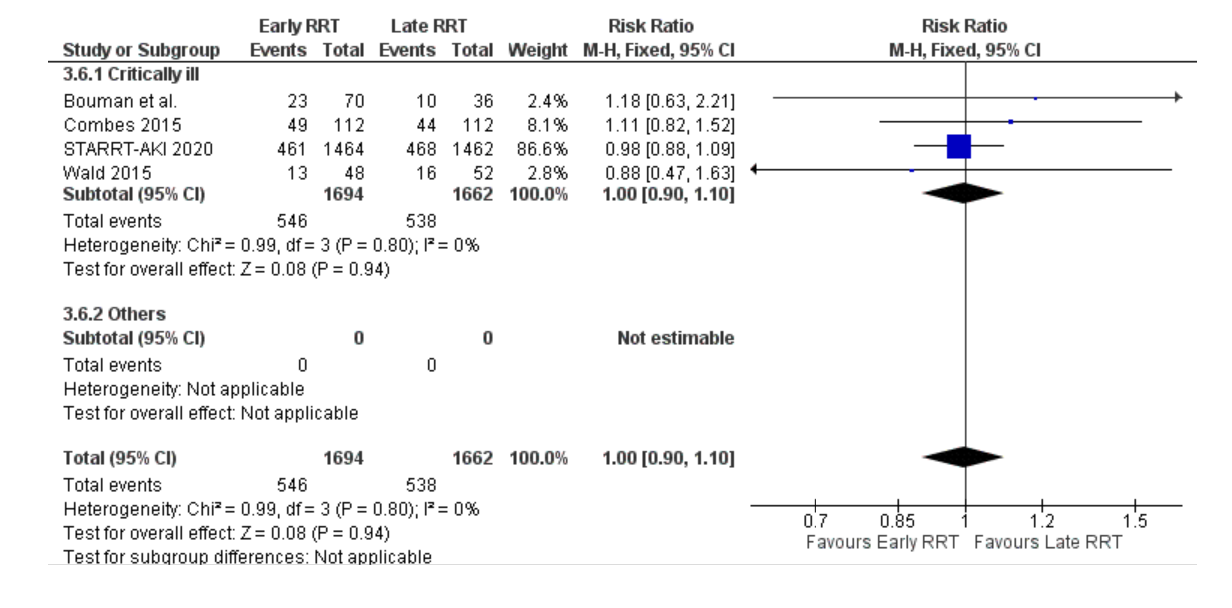

Supplement: Supplementary file 1 [file 27788583]
